# Supplementary material for: Co3O4 nanoparticles supported on N-doped electrospinning carbon nanofibers as an efficient and bifunctional oxygen electrocatalyst for rechargeable Zn–air batteries
Source: Royal Society of Chemistry journal article supplement (doi:10.1039/c9qi01020c), 2019-01-01
Supplement: c9qi01020c1.pdf [file c9qi01020c1.pdf]

Electronic Supplementary Information

## **Co<sub>3</sub>O<sub>4</sub> Nanoparticles Supported on N-doped Electrospinning Carbon Nanofibers as an Efficient and Bifunctional Oxygen Electrocatalyst for Rechargeable Zn-Air Batteries**

Liuzhe Qiu,<sup>a</sup> Xiaopeng Han,<sup>\*,a</sup> Qi Lu,<sup>a</sup> Jun Zhao,<sup>a</sup> Yang Wang,<sup>a</sup> Zelin Chen,<sup>a</sup> Cheng Zhong,<sup>a</sup> Wenbin Hu,<sup>a,b</sup> and Yida Deng<sup>\*,a</sup>

<sup>a</sup>School of Materials Science and Engineering, Key Laboratory of Advanced Ceramics and Machining Technology of Ministry of Education, Tianjin Key Laboratory of Composite and Functional Materials, Tianjin University, Tianjin 300072, P.R. China.

<sup>b</sup>Joint School of National University of Singapore and Tianjin University, International Campus of Tianjin University, Binhai New City, Fuzhou 350207, China.

\* Corresponding e-mail: [xphan@tju.edu.cn](mailto:xphan@tju.edu.cn); [yida.deng@tju.edu.cn](mailto:yida.deng@tju.edu.cn)

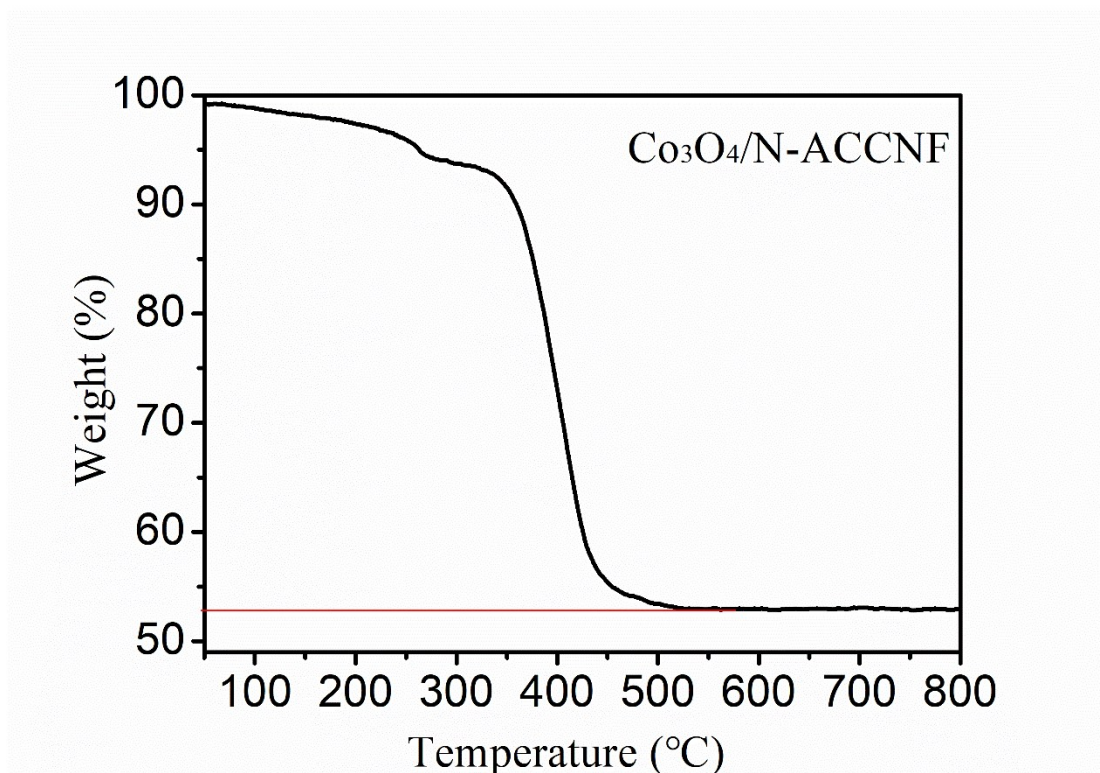

**Fig. S1** Thermogravimetric curve of Co<sub>3</sub>O<sub>4</sub>/N-ACCNF tested in air atmosphere at a heating rate of 10 °C min<sup>-1</sup>.

A weight loss of about 5% below 250°C for the Co<sub>3</sub>O<sub>4</sub>/N-ACCNF is the evaporation of absorbed water. A weight loss of about 42% between 250 and 550 °C is indicative of a complete carbon oxidation in which a residual amount of about 53%, due to the composite cobalt oxide, indicate that the mass percentage of Co<sub>3</sub>O<sub>4</sub> in the optimized Co<sub>3</sub>O<sub>4</sub>/N-ACCNF hybrid is 56% excluding the weight of the water.

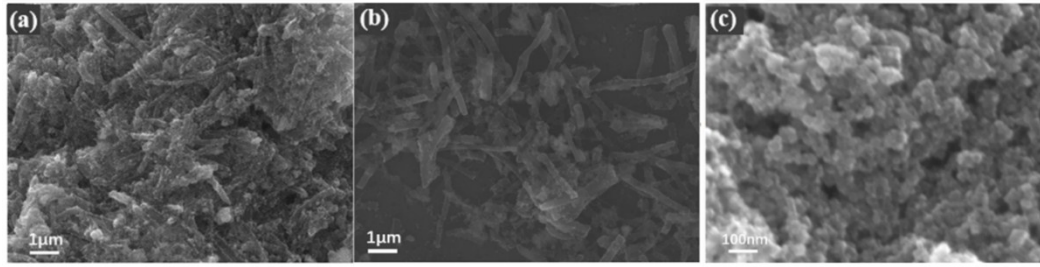

**Fig. S2** SEM images of (a)  $\text{Co}_3\text{O}_4/\text{N-ACCNF}$ , (b)  $\text{Co}_3\text{O}_4/\text{N-CNF}$ , and (c)  $\text{Co}_3\text{O}_4$  at low magnification.

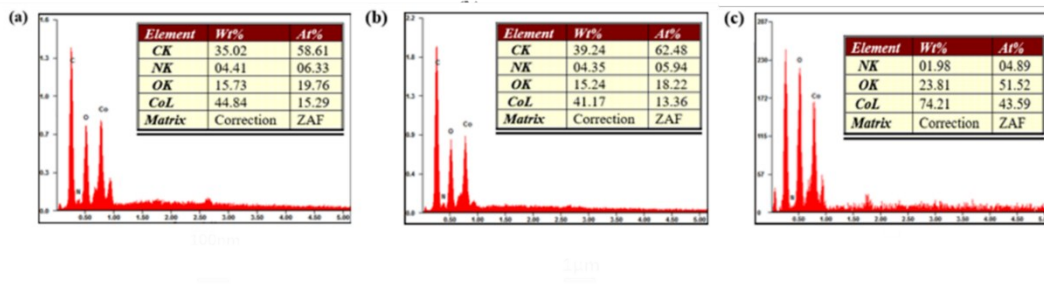

**Fig. S3** SEM-EDS images of (a)  $\text{Co}_3\text{O}_4/\text{N-ACCNF}$ , (b)  $\text{Co}_3\text{O}_4/\text{N-CNF}$ , and (c)  $\text{Co}_3\text{O}_4$ .

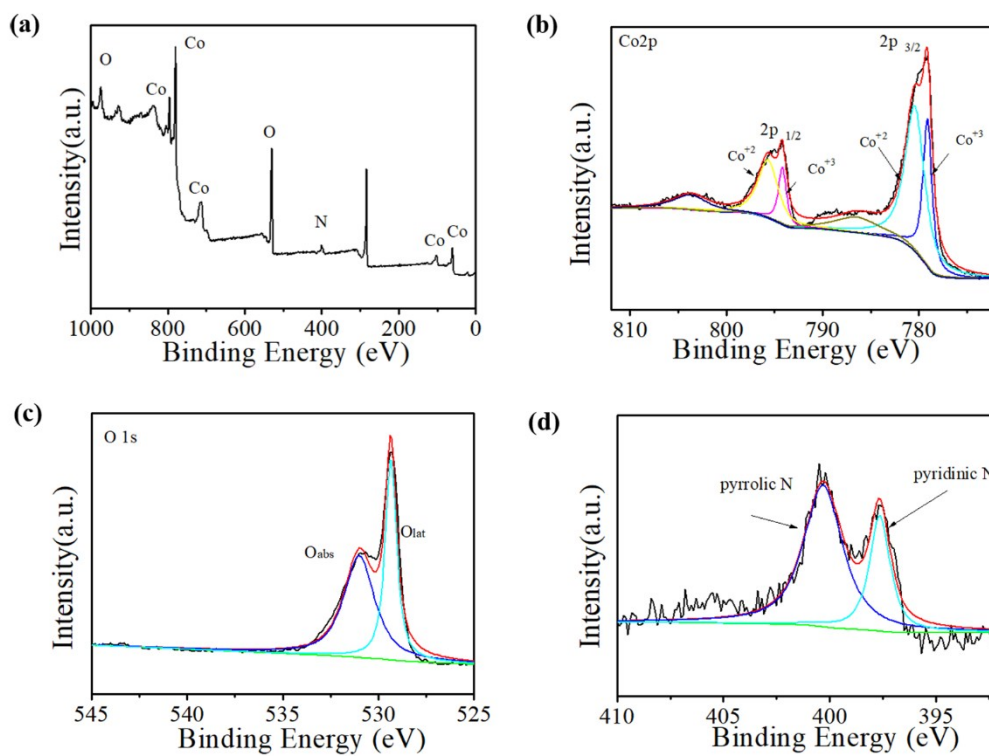

**Fig. S4** (a) XPS survey spectrum, (b)  $\text{Co}2p$ , (c)  $\text{O}1s$  (d)  $\text{N}1s$  of  $\text{Co}_3\text{O}_4\text{-N/CNF}$ .

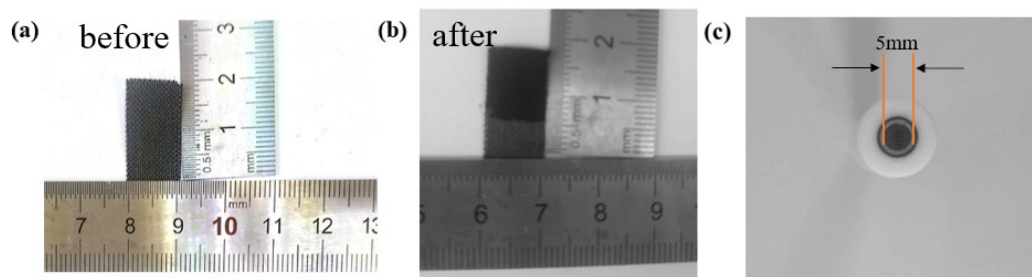

**Fig. S5** Carbon cloth for OER electrochemical measurements: (a) before and (b) after and the RRED for ORR (c).

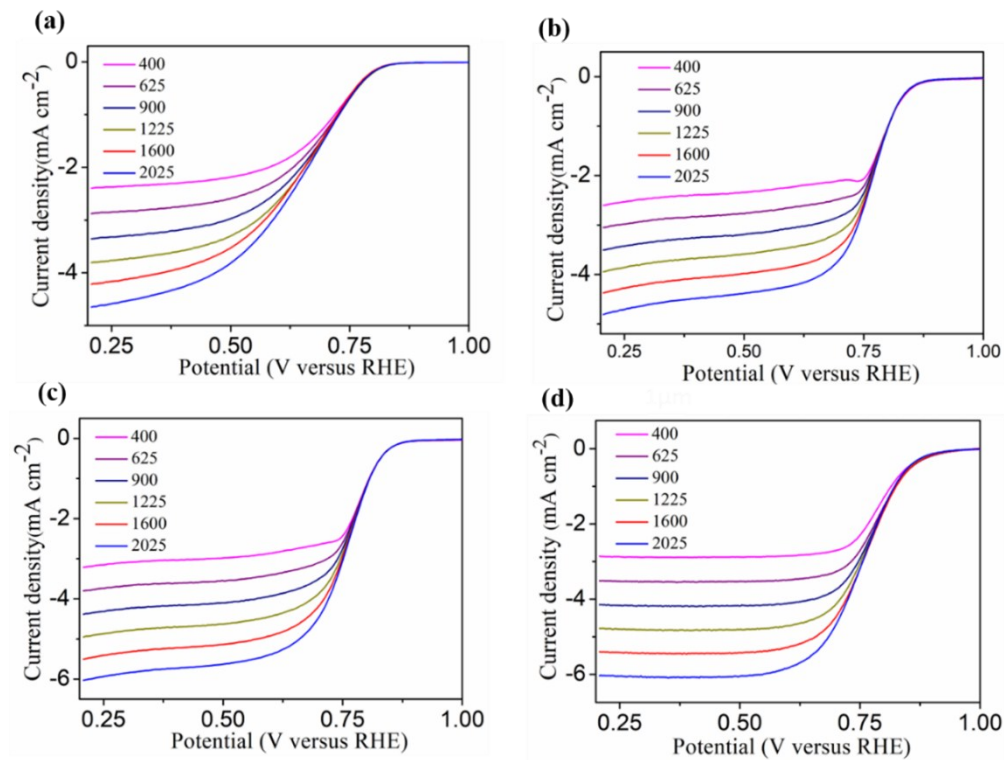

**Fig. S6** Rotating-disk voltammograms at different rotation rates: (a)  $\text{Co}_3\text{O}_4/\text{N-ACCNF}$ , (b)  $\text{Co}_3\text{O}_4/\text{N-CNF}$ , (c)  $\text{Co}_3\text{O}_4$ , and (d) Pt/C.

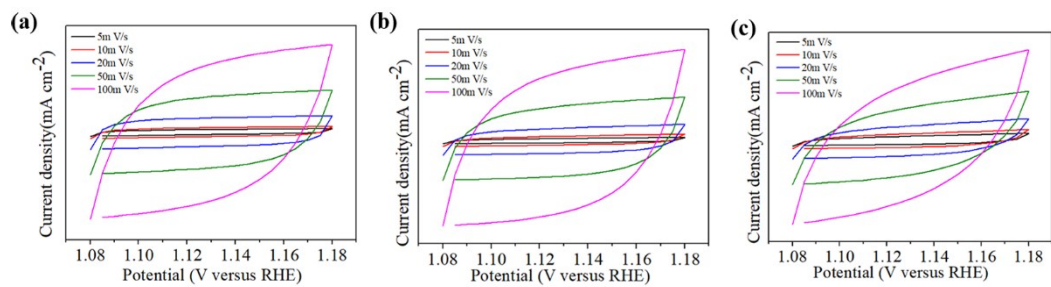

**Fig. S7** Cyclic Voltammetry plots in the region of 0.05-0.15V vs SCE of (a)  $\text{Co}_3\text{O}_4/\text{N-ACCNF}$ , (b)  $\text{Co}_3\text{O}_4/\text{N-CNF}$ , and (c)  $\text{Co}_3\text{O}_4$ .

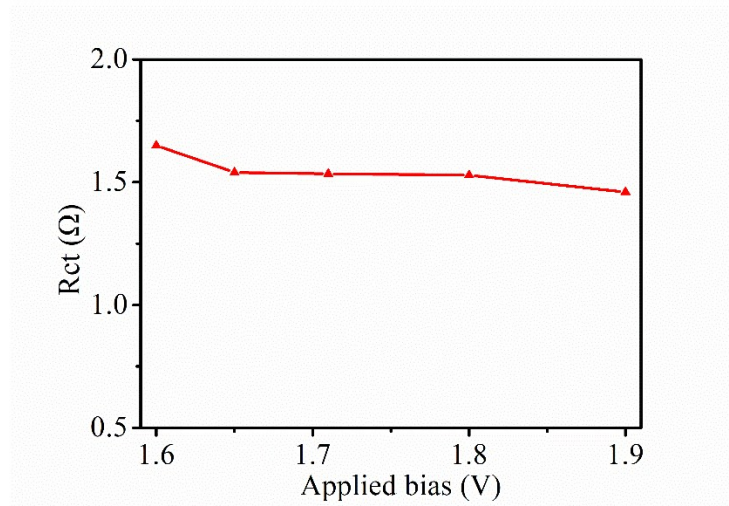

**Fig. S8** Nyquist plots of  $\text{Co}_3\text{O}_4/\text{N-ACCNF}$  at different base of 1.60 V, 1.65 V, 1.71 V, 1.8V and 1.9V, extracted from impedance spectra measured with different applied bias. As show in Fig. S8,  $R_{ct}$  varies slightly with the different applied bias. In the entire range of applied bias, a slight decreased  $R_{ct}$  values were observed.

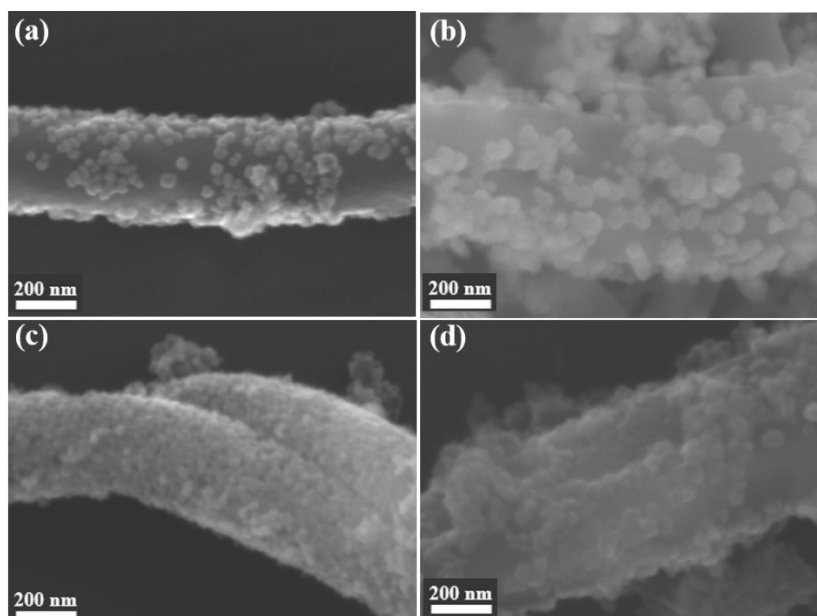

**Fig. S9** SEM images of samples with different ACCNF addition amount: (a) 25mg, (b) 50 mg, (c) 75 mg and (d) 100 mg. In this experiment, the amount of loading  $\text{Co}_3\text{O}_4$  particle can be adjusted by adjusting the addition amount of CNFs.

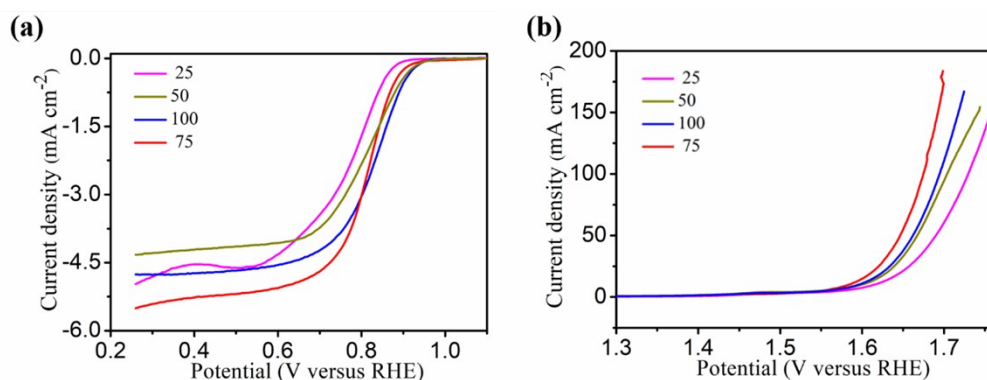

**Fig. S10** (a) ORR and (b) OER activities of 25mg, 50 mg, 75 mg, 100 mg CNFs addition in  $\text{Co}_3\text{O}_4/\text{N-ACCNF}$  hybrid. SEM images show that, other conditions remain unchanged, when the added amount of CNFs is 75mg, LSV curves indicate that the sample with 75mg CNFs addition exhibits the best performance.

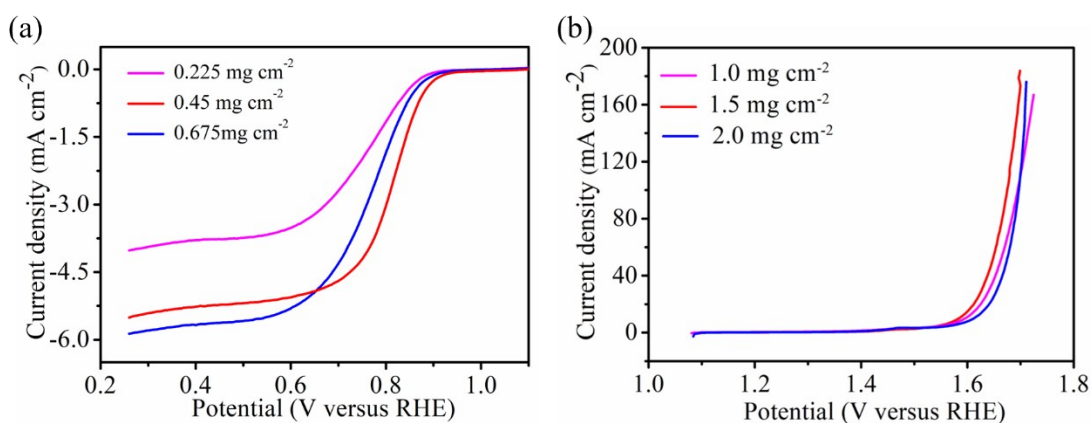

**Fig. S11** (a) ORR and (b) OER activities of various catalyst mass loading of  $\text{Co}_3\text{O}_4/\text{N-ACCNF}$  hybrid.

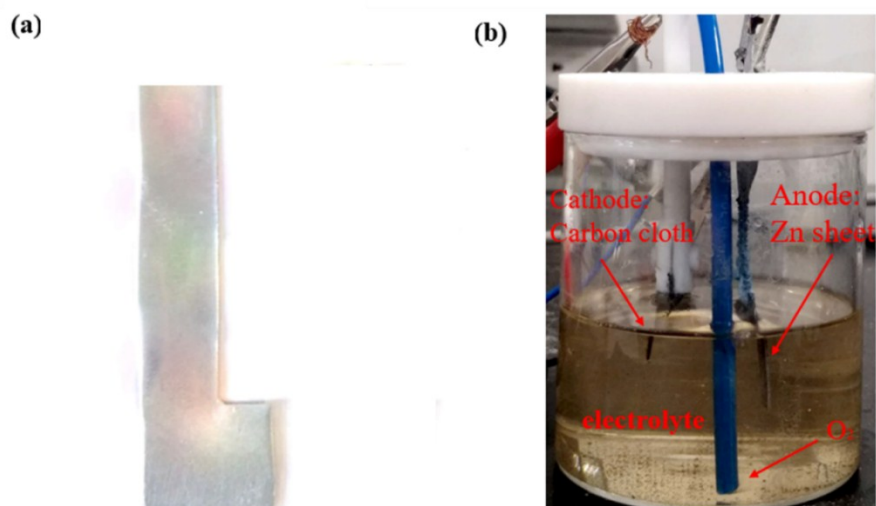

**Fig. S12** (a) Polished zinc foil anode and (b) the assembled zinc-air battery device.

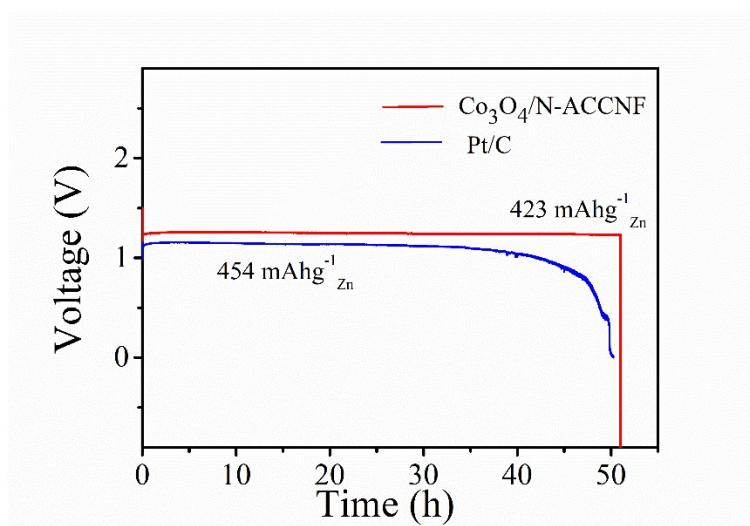

**Fig. S13** Typical discharge curves of Co<sub>3</sub>O<sub>4</sub>/N-ACCNF and Pt/C-based ZABs at 10 mA cm<sup>-2</sup>.



**Table. S1** Summary of OER and ORR activities of synthesized catalysts.

| Catalysts                               | OER Activity                              |                                             | ORR Activity               |                                                   |                                                 | Overall evaluation                       |
|-----------------------------------------|-------------------------------------------|---------------------------------------------|----------------------------|---------------------------------------------------|-------------------------------------------------|------------------------------------------|
|                                         | Overpotential @10 mA cm <sup>-2</sup> (V) | double layer capacitance (C <sub>dl</sub> ) | Onset potential (V vs RHE) | Half-wave potential (E <sub>1/2</sub> , V vs RHE) | Limiting current density (mA cm <sup>-2</sup> ) | $\Delta E = E_{j=10^{-6}} - E_{1/2}$ (V) |
| Co <sub>3</sub> O <sub>4</sub> -N/ACCNF | 310                                       | 48.0                                        | 0.98                       | 0.79                                              | 5.80                                            | 0.75                                     |
| Co <sub>3</sub> O <sub>4</sub> -N/CNF   | 440                                       | 38.70                                       | 0.93                       | 0.74                                              | 4.49                                            | 0.93                                     |
| Co <sub>3</sub> O <sub>4</sub>          | 630                                       | 17.9                                        | 0.90                       | 0.69                                              | 4.40                                            | 1.17                                     |
| Pt/C                                    | ~                                         | ~                                           | 0.96                       | 0.82                                              | 5.50                                            | ~                                        |
| IrO <sub>2</sub>                        | 320                                       | ~                                           | ~                          | ~                                                 | ~                                               | ~                                        |

**Table. S2** Comparison of electrocatalytic performances of Co<sub>3</sub>O<sub>4</sub>-N/ACCNF with other reported Co-based ORR electrocatalysts.

| Catalyst                                              | Electrolyte | Loading density (mg cm <sup>-2</sup> ) | Current density (mA cm <sup>-2</sup> ) | half-wavepotential (V) | Reference |
|-------------------------------------------------------|-------------|----------------------------------------|----------------------------------------|------------------------|-----------|
| Co <sub>3</sub> O <sub>4</sub> nanoplates             | 0.1 M KOH   | 0.2                                    | 5.32                                   | 0.72                   | S1        |
| Co(OH) <sub>2</sub> nanoplates                        | 0.1 M KOH   | 0.2                                    | 5.24                                   | 0.69                   | S1        |
| CoO <sub>x</sub> /NG/g-C <sub>3</sub> N <sub>4</sub>  | 0.1 M KOH   | 0.16                                   | 4.9                                    | 0.794                  | S1        |
| Co <sub>3</sub> O <sub>4</sub> @NMC                   | 0.1 M KOH   | 0.408                                  | ~                                      | 0.833                  | S2        |
| Co <sub>3</sub> O <sub>4</sub> /N-doped carbon        | 0.1 M KOH   | 0.86                                   | 2.15                                   | 0.95                   | S4        |
| Co <sub>3</sub> O <sub>4</sub> nanoparticles /N-doped | 0.1 M KOH   | 1.0                                    | 5.95                                   | 0.86                   | S5        |
| NCO-250                                               | 0.1 M KOH   | 0.149                                  | 5.31                                   | 0.75                   | S6        |
| Co <sub>3</sub> O <sub>4</sub> -NP/N-rGO              | 0.1 M KOH   | 0.149                                  | 5.48                                   | 0.76                   | S7        |

**Table. S3** Comparison of electrocatalytic performances of Co<sub>3</sub>O<sub>4</sub>-N/ACCNF with other reported Co-based OER electrocatalysts.

| Catalysts                                 | Support base | Electrolyte | Loading density (mg cm <sup>-2</sup> ) | Overpotential at 10 mA cm <sup>-2</sup> (mV) | Reference |
|-------------------------------------------|--------------|-------------|----------------------------------------|----------------------------------------------|-----------|
| Co <sub>3</sub> O <sub>4</sub> nanoplates | GC           | 1 M KOH     | 0.2                                    | 390.1                                        | S1        |
| Co(OH) <sub>2</sub> nanoplates            | GC           | 1 M KOH     | 0.2                                    | 396.0                                        | S1        |
| CoOx/NG/PCN                               | GC           | 0.1 M KOH   | 0.16                                   | 430.0                                        | S2        |
| Co <sub>3</sub> O <sub>4</sub> @NMC       | Carbon cloth | 0.1 M KOH   | 0.408                                  | 350.5                                        | S3        |
| NCO-250                                   | GC           | 1 M KOH     | 0.149                                  | 320                                          | S6        |
| Co <sub>3</sub> O <sub>4</sub> -NP/N-rGO  | GC           | 1 M KOH     | 0.15                                   | 380                                          | S7        |
| Co <sub>3</sub> O <sub>4</sub> -N/ACCNF   | Carbon cloth | 1 M KOH     | 1.5                                    | 310                                          | This work |

**Table. S4** Comparison of the bifunctional activity of Co<sub>3</sub>O<sub>4</sub>-N/ACCNF with previously reported transition metal-based materials.

| Catalysts                               | OER Activity                              |                                             | ORR Activity                                      |                                                 | Overall evaluation<br>$\Delta E = E_{j=10} - E_{1/2}$<br>(V) | Reference |
|-----------------------------------------|-------------------------------------------|---------------------------------------------|---------------------------------------------------|-------------------------------------------------|--------------------------------------------------------------|-----------|
|                                         | Overpotential @10 mA cm <sup>-2</sup> (V) | double layer capacitance (C <sub>dl</sub> ) | Half-wave potential (E <sub>1/2</sub> , V vs RHE) | Limiting current density (mA cm <sup>-2</sup> ) |                                                              |           |
| Co <sub>3</sub> O <sub>4</sub> -N/ACCNF | 310                                       | 48.0                                        | 0.79                                              | 5.80                                            | 0.75                                                         | This work |
| Co <sub>2</sub> Ni <sub>1</sub> @NC     | 300                                       | 11                                          | 0.76                                              | 4.05                                            | 0.77                                                         | S8        |
| (Ni <sub>5</sub> Co)/CNT                | N.A.                                      | ~                                           | 0.74                                              | 5                                               | 0.87                                                         | S9        |
| NC- Co <sub>3</sub> O <sub>4</sub> /CC  | 352                                       | ~                                           | 0.87                                              | 12.82                                           | 0.71                                                         | S10       |
| CMN-231 nanorods                        | 401                                       | ~                                           | 0.749 V                                           | 6                                               | 0.88 V                                                       | S11       |
| Co-CeO <sub>2</sub> -N-C                | 326                                       | 41.0                                        | 0.82                                              | 3.8                                             | 0.74                                                         | S12       |
| N-NiO                                   | 270                                       | 28.4                                        | 0.69                                              | 3.4                                             | 0.83                                                         | S13       |
| Mn/Co-N-C                               | 430                                       | 6.32                                        | 0.8                                               | 5.1                                             | 0.76                                                         | S14       |

### References

- S1 P. Tan, Z Wu, B. Chen, H. Xu, W. Cai, M. Ni, *Electrochim. Acta.*, 2019, **310**, 86-95.
- S2 W. Chen, L. Ge, L. Ding, Y. Xu, F. You, K. Wang, *J. Alloy Compd.* 2019, **789**, 874-880.
- S3 Y. Wang, X. Xu, L. Liu, J. Chen, G. Shi, *Dalton transactions*, 2019, **48**, 7150-7157.
- S4 B. Wang, L. Xu, G. Liu, P. Zhang, W. Zhu, J. Xia, H. Li, *J. Mater. Chem. A.*, 2017, **5**, 20170-20179.

- S5 Z. Liu, Q. Su, P. Diao, F. Li, *Chemelectrochem*, 2017, **4**, 2260-2268.
- S6 J. Zhao, J. Y. He, Z. Chen, X. Zheng, X. Han, D. Rao, C. Zhong, W. Hu, Y. Deng, *ACS Appl. Mater. Interfaces* 2019, **11**, 4915-4921.
- S7 X. Han, G. He, Y. He, J. Zhang, X. Zheng, L. Li, C. Zhong, W. Hu, Y. Deng and T.-Y. Ma, *Adv. Energy Mater.*, 2018, **8**, 1702222.
- S8 J. Ran, X. Guo, P. Liu, S. Peng, X. Gao and D. Gao, *Nanotechnology*, 2019, **30**.
- S9 N. Ma.; Y. Jia.; X. F. Yang.; X. L. She.; L. Z. Zhang.; Z. Peng.; X. D. Yao.; D. J. Yang. *J. Mater. Chem. A* 2016, **4**, 6376-6384.
- S10 Guan, C.; Sumboja, A.; Wu, H.; Ren, W.; Liu, X.; Zhang, H.; Liu, Z.; Cheng, C.; Pennycook, S. J.; Wang, J. Hollow. *Adv. Mater.* 2017, **29**, 1704117.
- S11 Q. Wang, Y. Xue, S. Sun, S. Yan, H. Miao and Z. Liu, *J Power Sources*, 2019, **435**.
- S12 Z. Zhang, D. Gao, D. Xue, Y. Liu, P. Liu, J. Zhang and J. Qian, *Nanotechnology*, 2019, **30**
- S13 C. Li, Z. Yu, H. Liu and M. Xiong, *Chem Eng J*, 2019, **371**, 433-442.
- S14 L. Wei, L. Qiu, Y. Liu, J. Zhang, D. Yuan and L. Wang, *Acs Sustain Chem Eng*, 2019, **7**, 14180-14188.
